# Supplementary material
Source: publisher site journal article supplement (https://www.dovepress.com/article/supplementary_file/553626/553626%20Revised%20Supplementary%20Material.xlsx)
Supplement: Supplementary file 1 [file 553626%20Revised%20Supplementary%20Material.xlsx]

## Sheet: Supp Table 1. MT
Supplementary Table S1. The values of MT at different ZT time points
	C1	C2	C3	S31	S32	S33	L31	L32	L33	S61	S62	S63	L61	L62	L63	p_value	p_value_adj
MT(ZT0)	17.5971	15.3459	15.8227	17.6881	16.6587	16.9297	16.2747	15.9086	15.4798	18.3469	16.7245	15.5312	15.9663	15.325	14.949	0.173388	0.173388
MT(ZT4)	15.4587	16.4447	15.8643	14.7205	17.4329	15.3249	18.2695	17.2167	16.0251	15.5458	15.5208	15.8641	17.7091	17.4534	16.3878	0.134137	0.134137
MT(ZT8)	18.8803	17.4762	18.1007	18.0685	18.7875	17.9267	17.764	17.7321	17.5646	17.5221	17.4202	17.5797	16.074	17.4106	16.691	0.0366754	0.0366754
MT(ZT12)	30.463	28.5044	26.9639	31.1012	27.4701	25.6655	27.4041	26.9639	28.3504	29.6928	29.1866	28.8565	28.3064	26.1937	26.9859	0.344567	0.344567
MT(ZT16)	29.5167	31.0792	28.7245	27.7562	27.03	30.9912	35.7007	29.2306	27.4701	27.184	27.8442	30.0449	34.1602	29.0766	28.7465	0.662627	0.662627
MT(ZT20)	32.0915	33.0598	33.2359	35.3486	30.7931	31.3213	29.1646	31.2553	31.6954	31.8275	31.1672	29.5387	28.5924	28.5264	27.5581	0.0433307	0.0433307
Footnote：p_value was analyzed using Kruskal-Wallis. p_values were adjusted for multiple comparisons using the false discovery rate (FDR) correction via the Benjamini-Hochberg method. The adjusted p_values are reported as p_values_adj. p_values ≤ 0.05 were considered to be significant.

## Sheet: Supp Table 2. AANAT
Supplementary Table S2. The values of AA-NAT at different ZT time points
	C1	C2	C3	S31	S32	S33	L31	L32	L33	S61	S62	S63	L61	L62	L63	p_val	p_val_adj
AA-NAT(ZT0)	15.5971	15.3459	15.8227	17.6881	17.6587	16.9297	16.2747	15.9086	16.4798	18.3469	18.7245	18.5312	15.9663	15.325	14.949	0.0144037	0.0144037
AA-NAT(ZT4)	15.4587	15.4447	15.8643	16.7205	16.4329	16.3249	18.2695	18.2167	18.0251	15.5458	15.5208	15.8641	17.7091	17.4534	17.3878	0.0117749	0.0117749
AA-NAT(ZT8)	18.8803	17.4762	18.1007	18.0685	18.7875	17.9267	17.764	17.7321	17.5646	17.5221	17.4202	17.5797	16.074	17.4106	16.691	0.0366754	0.0366754
AA-NAT(ZT12)	30.463	28.5044	26.9639	31.1012	27.4701	25.6655	27.4041	26.9639	28.3504	29.6928	29.1866	28.8565	28.3064	26.1937	26.9859	0.344567	0.344567
AA-NAT(ZT16)	29.5167	31.0792	28.7245	27.7562	27.03	30.9912	35.7007	29.2306	27.4701	27.184	27.8442	30.0449	34.1602	29.0766	28.7465	0.662627	0.662627
AA-NAT(ZT20)	32.0915	33.0598	33.2359	35.3486	30.7931	31.3213	29.1646	31.2553	31.6954	31.8275	31.1672	29.5387	28.5924	28.5264	27.5581	0.0433307	0.0433307
Footnote：p_value was analyzed using Kruskal-Wallis. p_values were adjusted for multiple comparisons using the false discovery rate (FDR) correction via the Benjamini-Hochberg method. The adjusted p_values are reported as p_values_adj. p_values ≤ 0.05 were considered to be significant.

## Sheet: Supp Table 3. Clock gene
Supplementary Table S3.The CPM values of clock-genes in different treatment groups
gene_name	C1_CPM	C2_CPM	C3_CPM	L31_CPM	L32_CPM	L33_CPM	L61_CPM	L62_CPM	L63_CPM	S31_CPM	S32_CPM	S33_CPM	S61_CPM	S62_CPM	S63_CPM	L6_vs_C_edgeR_Pvalue	L6_vs_C_edgeR_log2FC	L6_vs_C_edgeR_(Pvalue_0.05_FC_1.5)_regulated	S6_vs_S3_edgeR_Pvalue	S6_vs_S3_edgeR_log2FC	S6_vs_S3_edgeR_(Pvalue_0.05_FC_1.5)_regulated	L6_vs_L3_edgeR_Pvalue	L6_vs_L3_edgeR_log2FC	L6_vs_L3_edgeR_(Pvalue_0.05_FC_1.5)_regulated	L3_vs_S3_edgeR_Pvalue	L3_vs_S3_edgeR_log2FC	L3_vs_S3_edgeR_(Pvalue_0.05_FC_1.5)_regulated	L3_vs_C_edgeR_Pvalue	L3_vs_LC_edgeR_log2FC	L3_vs_C_edgeR_(Pvalue_0.05_FC_1.5)_regulated	S3_vs_C_edgeR_Pvalue	S3_vs_C_edgeR_log2FC	S3_vs_C_edgeR_(Pvalue_0.05_FC_1.5)_regulated	L6_vs_S6_edgeR_Pvalue	L6_vs_S6_edgeR_log2FC	L6_vs_S6_edgeR_(Pvalue_0.05_FC_1.5)_regulated	S6_vs_C_edgeR_Pvalue	S6_vs_C_edgeR_log2FC	S6_vs_C_edgeR_(Pvalue_0.05_FC_1.5)_regulated
Rorb	3.45018	0.275433	2.24895	1.67665	2.26341	1.72993	1.76209	0.50022	0.370891	3.08308	3.31186	2.60868	0.144069	2.60262	2.0759	0.173679	-1.19202	normal	0.444458	-0.602138	normal	0.193765	-0.907211	normal	0.404317	-0.472841	normal	0.795345	-0.239073	normal	0.716343	0.285512	normal	0.369237	-0.845185	normal	0.732902	-0.350503	normal
Arntl	7.31438	3.99378	7.7107	10.7306	4.14958	7.92883	10.5725	7.75341	30.0422	11.4514	27.2309	19.3042	7.63565	7.21634	7.09266	0.0734243	1.12898	normal	0.030838	-1.07172	down	0.0597863	1.11285	normal	0.0179739	-1.1538	down	0.96782	0.0227992	normal	0.0240686	1.21815	up	0.0863149	1.01636	normal	0.839628	0.107594	normal
Dbp	37.814	84.4202	37.3755	79.641	51.8068	51.3211	46.9889	62.6525	375.713	44.1908	150.874	108.347	75.3481	44.5994	69.8887	0.0659292	1.3354	normal	0.482493	-0.349428	normal	0.0279832	1.43459	up	0.264613	-0.518213	normal	0.844446	-0.0821896	normal	0.406005	0.472293	normal	0.062216	1.2492	normal	0.853939	0.084615	normal
Hlf	0.96605	0	0.321279	1.00599	0.502979	0.14416	0.587362	0.50022	0.370891	1.61495	1.28795	0.521736	0	0.118301	0.691967	--	--	--	--	--	--	--	--	--	0.287797	-0.909617	normal	--	--	--	--	--	--	--	--	--	--	--	--
Rasd1	29.6715	13.0831	82.2475	15.2575	19.6162	29.8412	34.8012	25.136	17.8028	28.9222	99.5399	26.4346	26.3646	24.7248	32.6954	0.180525	-0.874479	normal	0.283311	-0.5801	normal	0.431641	0.382185	normal	0.0454924	-1.06424	down	0.0243857	-1.24337	down	0.862843	-0.120457	normal	0.786921	-0.131561	normal	0.188756	-0.733034	normal
Per1	6.48634	9.91559	10.388	22.8025	18.736	17.0109	13.9498	15.1316	106.075	9.8365	15.8233	10.7825	19.3052	23.4235	19.8941	0.00587452	2.06038	up	0.0181629	1.09778	up	0.0666443	1.22134	normal	0.0362843	0.874575	up	0.0352718	0.8513	up	0.979877	0.0145306	normal	0.153633	0.978459	normal	0.0152534	1.07751	up
Nr1d1	34.5018	25.3398	42.5159	22.2995	39.8611	30.4179	50.2194	35.2655	37.0891	35.2352	39.0064	49.5649	45.5258	40.3405	48.2647	0.862095	0.0885437	normal	0.310783	0.4279	normal	0.271178	0.49591	normal	0.594809	-0.218355	normal	0.286408	-0.388593	normal	0.798139	-0.120045	normal	0.700029	-0.176664	normal	0.481518	0.269276	normal
Senp3	0.828043	2.89205	0.963837	3.01797	2.26341	1.72993	1.02788	1.75077	4.07981	1.02769	2.02392	3.65215	5.04241	1.65621	1.21094	0.769189	0.249689	normal	0.435141	0.613256	normal	1	-0.0553529	normal	0.650692	0.281179	normal	0.674591	0.306882	normal	0.961445	0.0542524	normal	0.712372	-0.37368	normal	0.45235	0.624993	normal
Csnk1d	135.247	107.006	114.268	141.006	153.534	144.305	142.876	145.814	237.37	134.481	88.5003	138.608	180.807	124.452	137.182	0.406863	0.394278	normal	0.175677	0.603096	normal	0.412006	0.341472	normal	0.252757	0.458385	normal	0.814726	0.0716417	normal	0.448157	-0.348158	normal	0.693266	0.181504	normal	0.555352	0.214954	normal
Gsk3b	71.7637	2.61661	25.5952	25.3175	38.1007	56.5109	35.3886	27.0119	0.741783	59.6063	13.7994	36.6954	5.18648	48.385	53.1085	0.515478	-0.639889	normal	0.779343	0.199474	normal	0.320328	-0.770794	normal	0.622055	0.265961	normal	0.809824	0.160244	normal	0.936072	-0.0653575	normal	0.427007	-0.729709	normal	0.909954	0.0940175	normal
Auts2	3.31217	0.550866	1.28512	2.01198	1.1317	1.29744	1.90893	1.75077	0.370891	2.49583	2.94388	2.60868	0.144069	2.01111	2.42188	0.716383	-0.290741	normal	0.488124	-0.535052	normal	1	0.120608	normal	0.241352	-0.683994	normal	0.641788	-0.36545	normal	0.616934	0.355698	normal	0.901942	-0.0838951	normal	0.838901	-0.213449	normal
Serpine1	0.552029	0.41315	1.82058	2.01198	0.628724	2.59489	2.05577	1.25055	0	1.02769	3.31186	0.521736	1.29662	1.89281	0.864959	1	0.150995	normal	0.949164	0.094079	normal	0.630874	-0.38279	normal	0.762619	0.281571	normal	0.456199	0.564178	normal	0.75011	0.334047	normal	0.772447	-0.225444	normal	0.612378	0.391639	normal
Clock	13.2487	3.85606	3.21279	9.72458	6.91596	13.6952	8.95727	6.62791	9.64318	12.7728	5.70376	12.1738	4.46614	10.1739	6.57369	0.704116	0.242426	normal	0.689162	-0.225093	normal	0.736131	-0.180374	normal	0.768435	0.143341	normal	0.369324	0.443708	normal	0.587545	0.336352	normal	0.77069	0.168324	normal	0.918025	0.0693212	normal
Npffr2	0	0	0	0	0	0	0	0	0	0	0	0	0	0	0.172992	--	--	--	--	--	--	--	--	--	--	--	--	--	--	--	--	--	--	--	--	--	--	--	--
Mettl3	26.6354	25.0644	24.9527	19.9522	24.2687	29.1204	27.7528	24.3857	56.0046	23.1965	44.1582	36.6954	25.068	25.9079	29.9276	0.565147	0.297356	normal	0.920493	-0.0474443	normal	0.183661	0.622029	normal	0.460555	-0.303508	normal	0.359733	-0.308099	normal	0.931256	0.0422362	normal	0.488304	0.339986	normal	0.916247	-0.0429714	normal
Nr1d2	6.90036	3.02976	3.85535	3.8563	3.77234	3.74817	4.55205	3.8767	7.04694	8.51518	15.6393	7.13039	4.03393	3.66732	2.42188	0.979538	0.0169462	normal	0.021801	-1.29	down	0.350552	0.490162	normal	0.00838753	-1.26605	down	0.305856	-0.462849	normal	0.133091	0.848101	normal	0.414876	0.495998	normal	0.368873	-0.480511	normal
Fbxl3	71.7637	73.8161	56.0097	59.0182	78.339	73.3777	52.7157	63.0277	64.1642	80.3069	10.4876	64.5213	78.3735	57.2575	35.6363	0.50501	-0.320445	normal	0.468823	0.457047	normal	0.769309	-0.124393	normal	0.306346	0.597411	normal	0.586367	-0.173915	normal	0.237872	-0.738636	normal	0.998238	0.00226881	normal	0.438826	-0.321868	normal
Npy1r	1.51808	1.37717	0.642558	3.01797	1.76043	1.29744	1.32156	1.3756	7.41783	2.2022	1.65593	1.3913	0.576276	0.946406	1.55693	0.144093	1.24009	normal	0.51903	-0.510954	normal	0.344844	0.673173	normal	0.58942	0.356171	normal	0.396406	0.572742	normal	0.772822	0.240914	normal	0.0608094	1.54566	normal	0.66342	-0.307542	normal
Npy5r	0.690036	0.41315	0.428372	0.167665	0	0.288321	1.32156	0.375165	0	0.44044	0.919962	0.521736	0	0.473203	0.345984	--	--	--	--	--	--	--	--	--	--	--	--	--	--	--	--	--	--	--	--	--	--	--	--
Mtnr1a	0.96605	0	0.428372	0.502996	0	0.720802	0	0	0	0.44044	1.83992	0.86956	0	0.118301	0.864959	--	--	--	--	--	--	--	--	--	--	--	--	--	--	--	--	--	--	--	--	--	--	--	--
Nfil3	5.52029	2.20346	5.56884	3.01797	9.43085	9.94707	5.57994	7.25319	2.96713	7.34067	7.91167	4.52171	3.45765	6.26994	7.61164	0.817031	0.169977	normal	0.892259	0.0865983	normal	0.57284	-0.333334	normal	0.506177	0.358167	normal	0.318399	0.525855	normal	0.721808	0.220224	normal	0.871708	-0.0948325	normal	0.628035	0.269975	normal
Csnk2a2	16.1468	12.6699	15.6356	15.9282	21.1251	22.3449	20.7045	15.1316	8.15961	19.673	3.12787	19.1303	10.0848	15.3791	26.9867	0.783582	-0.149133	normal	0.354194	0.580738	normal	0.531673	-0.304811	normal	0.241547	0.666036	normal	0.607657	0.180554	normal	0.473869	-0.44725	normal	0.66304	-0.237824	normal	0.829897	0.0935179	normal
Rorc	0.138007	0	1.28512	0	0.125745	0.14416	0.440521	0.375165	0	0	4.59981	0	0	0.118301	0	--	--	--	--	--	--	--	--	--	--	--	--	--	--	--	--	--	--	--	--	--	--	--	--
Npy2r	2.34612	0.41315	1.07093	1.67665	0.880213	3.45985	2.34945	1.25055	1.85446	2.49583	6.80772	3.82606	0.288138	1.41961	4.1518	0.583561	0.404739	normal	0.248513	-0.916852	normal	1	-0.0416359	normal	0.138707	-0.931096	normal	0.534172	0.465199	normal	0.0420337	1.44736	up	0.957366	-0.0816338	normal	0.57139	0.498184	normal
Npffr1	0	0	0	0	0.125745	0	0	0	0	0	0.735969	0	0	0.236601	0	--	--	--	--	--	--	--	--	--	--	--	--	--	--	--	--	--	--	--	--	--	--	--	--
Csnk2b	83.0803	111.413	74.2155	102.443	117.068	94.8576	120.85	92.1655	191.009	94.1074	144.25	127.651	104.45	79.3798	126.457	0.444646	0.380653	normal	0.879239	0.0658635	normal	0.318155	0.426569	normal	0.959335	-0.0204727	normal	0.938816	-0.025981	normal	0.941756	0.0350692	normal	0.487246	0.320435	normal	0.871895	0.0624476	normal
Pax6	0.138007	0.550866	0.535465	0	0.754468	0	0.734202	0.875385	2.22535	0.734067	0.551977	0.521736	0.576276	1.06471	1.03795	--	--	--	--	--	--	--	--	--	--	--	--	--	--	--	--	--	--	0.682103	0.313527	normal	--	--	--
Csnk2a1	11.3166	1.92803	5.14047	6.03595	4.90404	3.17153	1.61525	2.37604	0.741783	5.4321	8.46365	5.21736	2.01697	3.78562	2.24889	0.0132219	-1.89826	down	0.105167	-0.911719	normal	0.0321428	-1.3404	down	0.627664	-0.247239	normal	0.359016	-0.516678	normal	0.734926	-0.229054	normal	0.303066	-0.708284	normal	0.0573535	-1.1818	normal
Cry2	6.76235	11.9813	6.53268	12.0719	11.6943	9.08211	13.9498	9.87934	38.5727	8.36837	16.3753	14.7825	17.5764	6.50654	10.0335	0.0964591	1.04811	normal	0.826795	0.122919	normal	0.0804639	0.948145	normal	0.895069	-0.0586754	normal	0.80194	0.117754	normal	0.705318	0.214072	normal	0.219072	0.753595	normal	0.583806	0.297115	normal
Arntl2	0.96605	0	0	0	0	0	0.14684	0.125055	0	0.293627	1.47194	0	0	0.709804	0	--	--	--	--	--	--	--	--	--	--	--	--	--	--	--	--	--	--	--	--	--	--	--	--
Bhlhe40	5.52029	6.61039	6.31849	8.71859	7.0417	5.76642	9.39779	4.75209	6.30515	6.6066	10.6716	7.13039	11.9577	9.93726	5.70873	0.953112	-0.0450095	normal	0.32816	0.51835	normal	1	0.00955746	normal	1	0.0101063	normal	0.963131	-0.0313426	normal	1	-0.00418303	normal	0.373539	-0.52066	normal	0.349976	0.477642	normal
Bhlhe41	35.1918	26.5793	28.4868	28.8384	28.4183	22.9215	27.1655	28.1374	77.1454	25.2519	60.7175	24.6955	39.619	29.5752	28.0247	0.491799	0.364587	normal	0.782896	0.138553	normal	0.118598	0.772351	normal	0.55398	-0.267307	normal	0.234533	-0.391478	normal	0.871347	-0.0824765	normal	0.507947	0.345269	normal	0.965361	0.0187885	normal
Per3	3.31217	0.275433	0.428372	1.00599	0.377234	1.29744	0.440521	0.50022	0	1.02769	2.75989	1.3913	0	2.01111	0.345984	--	--	--	0.434525	-0.728841	normal	--	--	--	0.285207	-0.756962	normal	0.490729	-0.663801	normal	0.909221	0.136804	normal	--	--	--	--	--	--
Vipr2	0.828043	0.826299	0.535465	1.00599	1.63468	0.432481	0.587362	0.375165	1.48357	1.17451	0.551977	0.86956	1.00848	1.18301	0.345984	--	--	--	0.74559	0.300305	normal	0.721835	-0.477488	normal	0.66334	0.414736	normal	--	--	--	--	--	--	0.812884	-0.365159	normal	--	--	--
Klf10	4.14022	1.37717	10.4951	6.03595	5.02979	5.33394	3.96469	5.12725	5.19248	3.67034	4.23182	7.47821	2.01697	4.61373	5.36274	0.652573	-0.350873	normal	0.953717	-0.0540381	normal	0.879655	-0.0938175	normal	0.539961	0.292589	normal	0.70925	-0.247987	normal	0.513652	-0.489252	normal	0.722719	0.229482	normal	0.402809	-0.579628	normal
Cry1	6.34833	7.98756	7.92489	8.88626	8.92788	10.9562	7.78254	8.00352	7.78872	8.36837	11.7755	11.3043	6.77124	6.50654	7.78463	0.87792	-0.0946814	normal	0.592256	-0.266861	normal	0.713517	-0.176953	normal	0.883835	0.0646746	normal	0.816985	0.104797	normal	0.889762	0.0824845	normal	0.809156	0.130781	normal	0.642108	-0.221396	normal
Csnk1e	10.9026	8.12528	4.92628	8.04793	8.17341	7.20802	7.04834	6.12769	31.8967	6.6066	4.96779	12.1738	6.62717	4.02222	7.43865	0.295188	0.708019	normal	0.902901	-0.0870845	normal	0.121132	0.94944	normal	0.707941	0.179743	normal	0.592123	-0.225932	normal	0.519983	-0.366841	normal	0.0704094	1.20362	normal	0.309844	-0.497167	normal
Tef	223.02	327.765	145.647	332.145	259.411	275.491	264.166	327.894	899.041	289.957	99.5399	257.042	433.936	274.339	210.704	0.121468	0.887935	normal	0.114667	0.827414	normal	0.0857994	0.841698	normal	0.206145	0.587652	normal	0.856535	0.0662777	normal	0.366631	-0.494539	normal	0.276395	0.5937	normal	0.510007	0.292147	normal
Timeless	0.96605	0	0.107093	0.167665	0.125745	0.576642	0.14684	0	0	1.32132	0.551977	0.173912	0.144069	1.18301	0	--	--	--	--	--	--	--	--	--	--	--	--	--	--	--	--	--	--	--	--	--	--	--	--
Npff	3.03616	8.12528	0.749651	5.36529	5.02979	4.03649	2.34945	3.50154	13.723	3.52352	0.551977	5.73909	8.64414	9.58236	4.84377	0.623376	0.441834	normal	0.0237045	1.56467	up	0.496148	0.428289	normal	0.243129	0.737581	normal	1	0.019165	normal	0.435517	-0.698656	normal	0.590544	-0.40938	normal	0.248628	0.831263	normal
Hcrtr2	1.38007	0.41315	0.642558	0.670661	0.880213	0.720802	0.881043	0.125055	0.741783	0.44044	1.28795	0.347824	0.288138	0	1.03795	--	--	--	--	--	--	--	--	--	--	--	--	--	--	--	--	--	--	--	--	--	--	--	--
Rora	0	0	0.107093	0.502996	0.125745	0	0	0.125055	0	0.146813	0.367985	0.347824	0	0.118301	0.518975	--	--	--	--	--	--	--	--	--	--	--	--	--	--	--	--	--	--	--	--	--	--	--	--
Tipin	10.9026	5.09551	9.53128	8.04793	6.79022	9.37043	8.51675	4.50198	4.4507	12.4791	16.7433	7.47821	5.47462	6.86144	8.3036	0.26293	-0.675983	normal	0.293359	-0.542329	normal	0.479416	-0.357779	normal	0.346829	-0.429012	normal	0.483461	-0.296553	normal	0.748341	0.17517	normal	0.641336	-0.267658	normal	0.39704	-0.404526	normal
Npas2	0.690036	1.10173	0.749651	1.17366	2.51489	1.58577	1.02788	1.3756	4.07981	0.734067	1.28795	1.91303	1.15255	0.709804	1.03795	0.209652	1.03179	normal	1	-0.113527	normal	0.708305	0.227775	normal	0.305727	0.653886	normal	0.237738	0.816414	normal	0.85386	0.205748	normal	0.215964	0.976317	normal	1	0.0544179	normal
Rev1	5.6583	3.02976	3.64116	7.04194	5.28128	4.7573	2.93681	4.37692	18.1737	8.07474	3.31186	10.4347	5.76276	5.67843	3.63283	0.241533	0.838489	normal	0.732761	-0.203803	normal	0.374338	0.57553	normal	0.746693	-0.176063	normal	0.554105	0.266711	normal	0.431284	0.481016	normal	0.388855	0.596901	normal	0.674415	0.236111	normal
Per2	13.8007	6.19724	9.74547	10.2276	16.2211	19.1733	15.7119	9.62923	8.90139	22.3156	6.62372	39.478	3.31359	19.5196	13.3204	0.88777	0.0845617	normal	0.368744	-0.608268	normal	0.525514	-0.305799	normal	0.483666	-0.389628	normal	0.304472	0.412602	normal	0.162659	0.852746	normal	0.848062	-0.126456	normal	0.725495	0.205542	normal
Adcyap1	56.721	31.9502	33.3059	20.7905	48.4117	39.9325	46.1079	19.8837	5.93426	45.0717	54.0937	46.2606	11.9577	34.7804	38.2312	0.168962	-0.874737	normal	0.312239	-0.490903	normal	0.423899	-0.491915	normal	0.60428	-0.22152	normal	0.334948	-0.356492	normal	0.848619	-0.086695	normal	0.699127	-0.258387	normal	0.166034	-0.614862	normal
Footnote：Differential expression analysis of two groups was performed using the edgeR. log2(Fold Change) values were calculated based on CPM. Genes with a p-value < 0.05 and fold change ≥ 1.5 were considered as DEGs. --：As a consequence of the minimal gene expression levels, the edgeR software filtered out this data, and it was not incorporated within the differential calculation.

## Sheet: Supp Table 4. clock-MT corr
Supplementary Table S4. The correlation between the clock gene and melatonin
clock gene	MT	Spearman's rank correlation coefficient	p_value	relation
Csnk2a1	MT(ZT8)	0.889286	0	positive
Mtnr1a	MT(ZT8)	0.763531	0.000924525	positive
Timeless	MT(ZT0)	0.722552	0.00234372	positive
Tipin	MT(ZT8)	0.717857	0.00356979	positive
Rorb	MT(ZT8)	0.703571	0.00458959	positive
Npas2	MT(ZT12)	-0.686327	0.00471991	negtive
Per1	MT(ZT20)	-0.65	0.0105567	negtive
Klf10	MT(ZT12)	-0.641645	0.00992355	negtive
Tef	MT(ZT8)	-0.607143	0.0186903	negtive
Auts2	MT(ZT8)	0.603571	0.0195408	positive
Adcyap1	MT(ZT8)	0.578571	0.0263691	positive
Pax6	MT(ZT8)	-0.577301	0.0242299	negtive
Csnk2a1	MT(ZT0)	0.55	0.0362844	positive
Fbxl3	MT(ZT20)	0.542857	0.0391586	positive
Cry1	MT(ZT12)	-0.534406	0.0401446	negtive
Hlf	MT(ZT8)	0.534406	0.0401446	positive
Csnk1e	MT(ZT16)	0.532143	0.0437917	positive
Bhlhe40	MT(ZT0)	0.528571	0.0454251	positive
Per3	MT(ZT8)	0.51832	0.0477699	positive
Rorb	MT(ZT0)	0.510714	0.0542955	positive
Csnk1d	MT(ZT8)	-0.510714	0.0542955	negtive
Gsk3b	MT(ZT4)	-0.503571	0.0581868	negtive
Pax6	MT(ZT20)	-0.478999	0.0708424	negtive
Dbp	MT(ZT20)	-0.467857	0.0808515	negtive
Csnk1d	MT(ZT20)	-0.467857	0.0808515	negtive
Csnk2b	MT(ZT20)	-0.467857	0.0808515	negtive
Npff	MT(ZT8)	-0.467857	0.0808515	negtive
Rev1	MT(ZT4)	-0.467857	0.0808515	negtive
Per1	MT(ZT8)	-0.460714	0.0860692	negtive
Auts2	MT(ZT0)	0.460714	0.0860692	positive
Timeless	MT(ZT12)	0.459889	0.0845621	positive
Npas2	MT(ZT0)	-0.457143	0.0887686	negtive
Tipin	MT(ZT0)	0.453571	0.0915293	positive
Npas2	MT(ZT20)	-0.453571	0.0915293	negtive
Timeless	MT(ZT4)	-0.446865	0.094931	negtive
Timeless	MT(ZT8)	0.443261	0.0979513	positive
Per3	MT(ZT0)	0.439678	0.10102	positive
Per2	MT(ZT4)	-0.439286	0.103199	negtive
Cry2	MT(ZT20)	-0.439286	0.103199	negtive
Nr1d2	MT(ZT0)	0.435714	0.106277	positive
Nfil3	MT(ZT16)	-0.432143	0.10942	negtive
Rorb	MT(ZT4)	-0.428571	0.11263	negtive
Rora	MT(ZT8)	0.413118	0.125889	positive
Adcyap1	MT(ZT0)	0.410714	0.129692	positive
Tipin	MT(ZT20)	0.407143	0.133311	positive
Arntl2	MT(ZT0)	0.406941	0.132223	positive
Rasd1	MT(ZT8)	0.396429	0.144595	positive
Fbxl3	MT(ZT4)	-0.389286	0.152477	negtive
Npffr1	MT(ZT16)	-0.385485	0.155898	negtive
Arntl2	MT(ZT12)	0.383108	0.158683	positive
Npas2	MT(ZT4)	0.382143	0.160652	positive
Gsk3b	MT(ZT12)	0.37891	0.163683	positive
Timeless	MT(ZT20)	0.369384	0.175412	positive
Rorc	MT(ZT4)	0.365168	0.180775	positive
Mtnr1a	MT(ZT0)	0.365167	0.180776	positive
Serpine1	MT(ZT4)	0.364286	0.182393	positive
Vipr2	MT(ZT0)	0.360714	0.186968	positive
Dbp	MT(ZT12)	-0.357462	0.19085	negtive
Csnk2a1	MT(ZT20)	0.357143	0.19162	positive
Clock	MT(ZT4)	-0.353571	0.196349	negtive
Hcrtr2	MT(ZT8)	0.353571	0.196349	positive
Npy5r	MT(ZT0)	0.351257	0.199222	positive
Senp3	MT(ZT12)	-0.350313	0.200515	negtive
Cry2	MT(ZT4)	0.35	0.201155	positive
Gsk3b	MT(ZT8)	0.342857	0.211	positive
Serpine1	MT(ZT16)	-0.342857	0.211	negtive
Mtnr1a	MT(ZT4)	-0.339347	0.215941	negtive
Rasd1	MT(ZT16)	-0.339286	0.216039	negtive
Rev1	MT(ZT0)	0.339286	0.216039	positive
Gsk3b	MT(ZT0)	0.332143	0.226353	positive
Tipin	MT(ZT12)	0.330653	0.22869	positive
Timeless	MT(ZT16)	-0.326139	0.235489	negtive
Csnk2a2	MT(ZT16)	0.325	0.236982	positive
Senp3	MT(ZT8)	-0.321429	0.242415	negtive
Dbp	MT(ZT4)	0.317857	0.247928	positive
Nr1d2	MT(ZT8)	0.317857	0.247928	positive
Senp3	MT(ZT20)	-0.317857	0.247928	negtive
Mettl3	MT(ZT20)	-0.317857	0.247928	negtive
Hlf	MT(ZT0)	0.314567	0.253493	positive
Arntl	MT(ZT20)	-0.314286	0.25352	negtive
Cry1	MT(ZT8)	0.314286	0.25352	positive
Klf10	MT(ZT0)	-0.314286	0.25352	negtive
Npy2r	MT(ZT8)	0.307143	0.264942	positive
Per2	MT(ZT0)	0.303571	0.270772	positive
Gsk3b	MT(ZT20)	0.3	0.276682	positive
Npy1r	MT(ZT20)	-0.3	0.276682	negtive
Bhlhe41	MT(ZT20)	-0.296429	0.282672	negtive
Bhlhe41	MT(ZT16)	-0.289286	0.294889	negtive
Arntl	MT(ZT12)	-0.287757	0.29834	negtive
Cry2	MT(ZT12)	-0.282395	0.307834	negtive
Per1	MT(ZT4)	0.282143	0.307425	positive
Rorb	MT(ZT20)	0.282143	0.307425	positive
Fbxl3	MT(ZT12)	0.277033	0.3175	positive
Npy5r	MT(ZT8)	0.275987	0.319406	positive
Rorc	MT(ZT16)	-0.274817	0.321546	negtive
Arntl2	MT(ZT16)	-0.27398	0.323082	negtive
Csnk2b	MT(ZT12)	-0.273459	0.324041	negtive
Clock	MT(ZT0)	0.267857	0.333446	positive
Pax6	MT(ZT0)	-0.266309	0.337351	negtive
Auts2	MT(ZT4)	-0.264286	0.340147	negtive
Klf10	MT(ZT20)	-0.260714	0.346928	negtive
Cry2	MT(ZT8)	-0.257143	0.353786	negtive
Dbp	MT(ZT0)	-0.257143	0.353786	negtive
Npy1r	MT(ZT16)	0.257143	0.353786	positive
Adcyap1	MT(ZT20)	0.257143	0.353786	positive
Rorc	MT(ZT12)	-0.254339	0.360315	negtive
Csnk1d	MT(ZT12)	-0.253798	0.361372	negtive
Cry1	MT(ZT4)	0.253571	0.360721	positive
Csnk2b	MT(ZT4)	0.246429	0.374825	positive
Fbxl3	MT(ZT0)	0.242857	0.381992	positive
Per1	MT(ZT0)	-0.239286	0.389235	negtive
Nr1d2	MT(ZT16)	-0.239286	0.389235	negtive
Npas2	MT(ZT8)	-0.239286	0.389235	negtive
Csnk2a1	MT(ZT4)	-0.235714	0.396553	negtive
Tipin	MT(ZT16)	-0.235714	0.396553	negtive
Rora	MT(ZT12)	-0.232587	0.404176	negtive
Tef	MT(ZT20)	-0.232143	0.403947	negtive
Senp3	MT(ZT4)	0.232143	0.403947	positive
Per3	MT(ZT4)	-0.228776	0.412137	negtive
Tipin	MT(ZT4)	-0.225	0.41896	negtive
Clock	MT(ZT12)	0.218052	0.434972	positive
Npy1r	MT(ZT8)	0.217857	0.434267	positive
Dbp	MT(ZT8)	-0.214286	0.44203	negtive
Vipr2	MT(ZT4)	-0.214286	0.44203	negtive
Nr1d1	MT(ZT0)	0.214286	0.44203	positive
Hcrtr2	MT(ZT4)	0.214286	0.44203	positive
Arntl2	MT(ZT8)	0.209514	0.4536	positive
Rasd1	MT(ZT0)	0.207143	0.457772	positive
Csnk1d	MT(ZT0)	-0.207143	0.457772	negtive
Npff	MT(ZT4)	-0.207143	0.457772	negtive
Adcyap1	MT(ZT4)	-0.207143	0.457772	negtive
Csnk1d	MT(ZT4)	0.203571	0.46575	positive
Mtnr1a	MT(ZT20)	0.199182	0.47666	positive
Nr1d1	MT(ZT4)	-0.196429	0.481914	negtive
Npy2r	MT(ZT20)	-0.196429	0.481914	negtive
Klf10	MT(ZT8)	0.196429	0.481914	positive
Nfil3	MT(ZT8)	0.192857	0.4901	positive
Arntl	MT(ZT16)	-0.189286	0.498353	negtive
Rora	MT(ZT20)	-0.188116	0.501966	negtive
Npffr2	MT(ZT12)	0.185743	0.507475	positive
Csnk2b	MT(ZT0)	-0.185714	0.506674	negtive
Npffr2	MT(ZT0)	-0.185577	0.507861	negtive
Npffr2	MT(ZT16)	0.185577	0.507861	positive
Npffr2	MT(ZT20)	-0.185577	0.507861	negtive
Csnk2b	MT(ZT8)	-0.182143	0.515061	negtive
Nr1d1	MT(ZT12)	-0.178731	0.523907	negtive
Tef	MT(ZT0)	-0.178571	0.523513	negtive
Tef	MT(ZT4)	0.178571	0.523513	positive
Csnk1e	MT(ZT12)	-0.175156	0.532376	negtive
Serpine1	MT(ZT0)	0.171429	0.540611	positive
Klf10	MT(ZT16)	0.171429	0.540611	positive
Hlf	MT(ZT16)	0.169795	0.545192	positive
Npffr1	MT(ZT0)	0.16849	0.54833	positive
Csnk1e	MT(ZT0)	-0.167857	0.549255	negtive
Auts2	MT(ZT12)	0.16622	0.55381	positive
Per2	MT(ZT8)	0.164286	0.557961	positive
Npy1r	MT(ZT4)	0.164286	0.557961	positive
Nr1d1	MT(ZT8)	-0.164286	0.557961	negtive
Nr1d1	MT(ZT20)	-0.164286	0.557961	negtive
Mettl3	MT(ZT16)	-0.164286	0.557961	negtive
Csnk2a2	MT(ZT4)	-0.164286	0.557961	negtive
Npy5r	MT(ZT4)	-0.161291	0.565787	negtive
Csnk2b	MT(ZT16)	0.160714	0.566727	positive
Npy2r	MT(ZT4)	-0.157143	0.575554	negtive
Per2	MT(ZT20)	0.153571	0.584439	positive
Rora	MT(ZT0)	0.151231	0.590569	positive
Rasd1	MT(ZT20)	0.15	0.593383	positive
Fbxl3	MT(ZT16)	-0.15	0.593383	negtive
Hcrtr2	MT(ZT20)	-0.15	0.593383	negtive
Bhlhe41	MT(ZT4)	0.146429	0.602383	positive
Rasd1	MT(ZT4)	-0.146429	0.602383	negtive
Rorb	MT(ZT16)	-0.146429	0.602383	negtive
Mettl3	MT(ZT0)	-0.146429	0.602383	negtive
Bhlhe40	MT(ZT16)	-0.146429	0.602383	negtive
Npy5r	MT(ZT20)	0.14337	0.61023	positive
Cry1	MT(ZT0)	-0.142857	0.61144	negtive
Mettl3	MT(ZT4)	-0.142857	0.61144	negtive
Per3	MT(ZT16)	-0.141198	0.615709	negtive
Npffr1	MT(ZT8)	0.140408	0.617704	positive
Rorc	MT(ZT0)	-0.139291	0.620533	negtive
Rorc	MT(ZT8)	0.139291	0.620533	positive
Mtnr1a	MT(ZT12)	0.137522	0.625022	positive
Hlf	MT(ZT20)	-0.135836	0.629311	negtive
Nr1d2	MT(ZT4)	-0.135714	0.629716	negtive
Npy5r	MT(ZT12)	0.13453	0.632641	positive
Rorb	MT(ZT12)	0.134048	0.63387	positive
Per1	MT(ZT12)	-0.132261	0.638442	negtive
Per3	MT(ZT20)	0.132261	0.638442	positive
Hcrtr2	MT(ZT16)	0.132143	0.638933	positive
Csnk1e	MT(ZT20)	-0.128571	0.648202	negtive
Npff	MT(ZT20)	-0.128571	0.648202	negtive
Pax6	MT(ZT16)	-0.125112	0.656846	negtive
Npffr1	MT(ZT20)	-0.125091	0.6569	negtive
Rev1	MT(ZT16)	-0.125	0.657521	negtive
Npffr2	MT(ZT4)	-0.123718	0.660457	negtive
Per2	MT(ZT16)	0.121429	0.666889	positive
Serpine1	MT(ZT20)	-0.121429	0.666889	negtive
Csnk2a1	MT(ZT16)	-0.121429	0.666889	negtive
Npffr1	MT(ZT4)	0.119985	0.670158	positive
Csnk2a2	MT(ZT20)	0.117857	0.676305	positive
Bhlhe41	MT(ZT0)	0.117857	0.676305	positive
Rora	MT(ZT16)	0.11619	0.680074	positive
Vipr2	MT(ZT12)	0.112601	0.689494	positive
Clock	MT(ZT8)	0.110714	0.695276	positive
Auts2	MT(ZT16)	0.110714	0.695276	positive
Mettl3	MT(ZT8)	-0.110714	0.695276	negtive
Npy1r	MT(ZT0)	-0.110714	0.695276	negtive
Per3	MT(ZT12)	0.109123	0.698662	positive
Mtnr1a	MT(ZT16)	-0.108812	0.699484	negtive
Per1	MT(ZT16)	-0.107143	0.704828	negtive
Senp3	MT(ZT0)	-0.107143	0.704828	negtive
Csnk2a2	MT(ZT8)	0.107143	0.704828	positive
Bhlhe40	MT(ZT4)	0.107143	0.704828	positive
Rev1	MT(ZT8)	0.107143	0.704828	positive
Npy1r	MT(ZT12)	-0.103664	0.713133	negtive
Adcyap1	MT(ZT12)	0.101877	0.717891	positive
Arntl2	MT(ZT4)	-0.100728	0.720954	negtive
Hcrtr2	MT(ZT12)	0.100089	0.722659	positive
Cry1	MT(ZT16)	-0.1	0.72406	negtive
Dbp	MT(ZT16)	0.1	0.72406	positive
Npy2r	MT(ZT0)	0.1	0.72406	positive
Npff	MT(ZT16)	0.1	0.72406	positive
Rasd1	MT(ZT12)	0.0929402	0.741822	positive
Cry2	MT(ZT16)	0.0928571	0.743454	positive
Arntl	MT(ZT8)	0.0892857	0.753207	positive
Npy5r	MT(ZT16)	0.0860221	0.7605	positive
Csnk2a2	MT(ZT12)	0.0857909	0.761126	positive
Arntl	MT(ZT0)	0.0821429	0.772822	positive
Bhlhe40	MT(ZT12)	0.080429	0.775692	positive
Rorc	MT(ZT20)	-0.0790569	0.779431	negtive
Arntl	MT(ZT4)	0.0785714	0.782681	positive
Nr1d2	MT(ZT12)	-0.0768544	0.785441	negtive
Tef	MT(ZT12)	0.0750671	0.790327	positive
Hcrtr2	MT(ZT0)	-0.0714286	0.802492	negtive
Serpine1	MT(ZT12)	0.0697051	0.805028	positive
Npff	MT(ZT12)	0.0697051	0.805028	positive
Mettl3	MT(ZT12)	-0.0643432	0.819789	negtive
Vipr2	MT(ZT8)	-0.0642857	0.822421	negtive
Bhlhe41	MT(ZT12)	0.0625559	0.824723	positive
Vipr2	MT(ZT20)	0.0607143	0.832426	positive
Klf10	MT(ZT4)	0.0607143	0.832426	positive
Bhlhe41	MT(ZT8)	0.0571429	0.842456	positive
Hlf	MT(ZT12)	0.0536673	0.849344	positive
Cry2	MT(ZT0)	-0.0535714	0.852509	negtive
Npy2r	MT(ZT16)	-0.0535714	0.852509	negtive
Npff	MT(ZT0)	-0.0535714	0.852509	negtive
Serpine1	MT(ZT8)	0.0535714	0.852509	positive
Vipr2	MT(ZT16)	-0.05	0.862585	negtive
Hlf	MT(ZT4)	0.0446828	0.874362	positive
Npy2r	MT(ZT12)	0.0446828	0.874362	positive
Csnk2a1	MT(ZT12)	0.0446828	0.874362	positive
Csnk1d	MT(ZT16)	0.0428571	0.882796	positive
Tef	MT(ZT16)	0.0428571	0.882796	positive
Bhlhe40	MT(ZT8)	-0.0428571	0.882796	negtive
Npffr1	MT(ZT12)	-0.039605	0.888552	negtive
Auts2	MT(ZT20)	0.0392857	0.892928	positive
Rora	MT(ZT4)	0.0387298	0.891002	positive
Nr1d2	MT(ZT20)	-0.0357143	0.903077	negtive
Clock	MT(ZT16)	0.0321429	0.91324	positive
Fbxl3	MT(ZT8)	0.0321429	0.91324	positive
Csnk1e	MT(ZT4)	-0.0321429	0.91324	negtive
Per2	MT(ZT12)	0.0303843	0.914398	positive
Csnk2a2	MT(ZT0)	0.0285714	0.923417	positive
Gsk3b	MT(ZT16)	-0.0285714	0.923417	negtive
Nfil3	MT(ZT12)	0.0268097	0.924441	positive
Senp3	MT(ZT16)	0.0214286	0.943802	positive
Rev1	MT(ZT20)	0.0214286	0.943802	positive
Pax6	MT(ZT4)	0.0196604	0.944556	positive
Npas2	MT(ZT16)	-0.0178571	0.954008	negtive
Adcyap1	MT(ZT16)	0.0178571	0.954008	positive
Arntl2	MT(ZT20)	-0.0120873	0.965898	negtive
Nr1d1	MT(ZT16)	-0.0107143	0.97444	negtive
Nfil3	MT(ZT0)	-0.0107143	0.97444	negtive
Csnk1e	MT(ZT8)	-0.0107143	0.97444	negtive
Pax6	MT(ZT12)	0.00894454	0.974762	positive
Cry1	MT(ZT20)	-0.00714286	0.984663	negtive
Nfil3	MT(ZT20)	-0.00714286	0.984663	negtive
Rev1	MT(ZT12)	-0.00536193	0.984869	negtive
Clock	MT(ZT20)	0.00357143	0.994887	positive
Nfil3	MT(ZT4)	0.00357143	0.994887	positive
Bhlhe40	MT(ZT20)	0.00357143	0.994887	positive
Npffr2	MT(ZT8)	0	1
Footnote：Spearman correlation analysis separately for the gene expression levels and the concentrations of MT. p_value＜0.05 were considered to be significant correlation.

## Sheet: Supp Table 5. clock-AANAT corr
Supplementary Table S5.The correlation between the clock gene and AA-NAT
clock gene	AA-NAT	Spearman's rank correlation coefficient	p_value	relation
Csnk2a1	AA-NAT(ZT8)	0.889286	0	positive
Mtnr1a	AA-NAT(ZT8)	0.763531	0.000924525	positive
Tipin	AA-NAT(ZT8)	0.717857	0.00356979	positive
Rorb	AA-NAT(ZT8)	0.703571	0.00458959	positive
Npas2	AA-NAT(ZT12)	-0.686327	0.00471991	negtive
Per1	AA-NAT(ZT20)	-0.65	0.0105567	negtive
Klf10	AA-NAT(ZT12)	-0.641645	0.00992355	negtive
Tef	AA-NAT(ZT8)	-0.607143	0.0186903	negtive
Auts2	AA-NAT(ZT8)	0.603571	0.0195408	positive
Adcyap1	AA-NAT(ZT8)	0.578571	0.0263691	positive
Pax6	AA-NAT(ZT8)	-0.577301	0.0242299	negtive
Npas2	AA-NAT(ZT4)	0.560714	0.0322794	positive
Cry1	AA-NAT(ZT4)	0.542857	0.0391586	positive
Fbxl3	AA-NAT(ZT20)	0.542857	0.0391586	positive
Cry1	AA-NAT(ZT12)	-0.534406	0.0401446	negtive
Hlf	AA-NAT(ZT8)	0.534406	0.0401446	positive
Csnk1e	AA-NAT(ZT16)	0.532143	0.0437917	positive
Csnk1d	AA-NAT(ZT4)	0.521429	0.0488302	positive
Per3	AA-NAT(ZT8)	0.51832	0.0477699	positive
Csnk1d	AA-NAT(ZT8)	-0.510714	0.0542955	negtive
Timeless	AA-NAT(ZT0)	0.508129	0.0531234	positive
Bhlhe40	AA-NAT(ZT0)	0.503571	0.0581868	positive
Pax6	AA-NAT(ZT20)	-0.478999	0.0708424	negtive
Dbp	AA-NAT(ZT20)	-0.467857	0.0808515	negtive
Csnk1d	AA-NAT(ZT20)	-0.467857	0.0808515	negtive
Csnk2b	AA-NAT(ZT20)	-0.467857	0.0808515	negtive
Npff	AA-NAT(ZT8)	-0.467857	0.0808515	negtive
Per1	AA-NAT(ZT8)	-0.460714	0.0860692	negtive
Timeless	AA-NAT(ZT12)	0.459889	0.0845621	positive
Npas2	AA-NAT(ZT20)	-0.453571	0.0915293	negtive
Timeless	AA-NAT(ZT8)	0.443261	0.0979513	positive
Rora	AA-NAT(ZT0)	0.440782	0.100067	positive
Arntl	AA-NAT(ZT4)	0.439286	0.103199	positive
Cry2	AA-NAT(ZT20)	-0.439286	0.103199	negtive
Nfil3	AA-NAT(ZT16)	-0.432143	0.10942	negtive
Serpine1	AA-NAT(ZT0)	0.417857	0.122661	positive
Csnk1e	AA-NAT(ZT0)	-0.417857	0.122661	negtive
Rora	AA-NAT(ZT8)	0.413118	0.125889	positive
Tipin	AA-NAT(ZT20)	0.407143	0.133311	positive
Rasd1	AA-NAT(ZT8)	0.396429	0.144595	positive
Npffr1	AA-NAT(ZT16)	-0.385485	0.155898	negtive
Arntl2	AA-NAT(ZT12)	0.383108	0.158683	positive
Npy1r	AA-NAT(ZT4)	0.382143	0.160652	positive
Mtnr1a	AA-NAT(ZT0)	0.379921	0.162469	positive
Gsk3b	AA-NAT(ZT12)	0.37891	0.163683	positive
Nr1d1	AA-NAT(ZT0)	0.378571	0.16485	positive
Npffr2	AA-NAT(ZT0)	0.371154	0.173193	positive
Timeless	AA-NAT(ZT20)	0.369384	0.175412	positive
Nfil3	AA-NAT(ZT0)	0.367857	0.177894	positive
Dbp	AA-NAT(ZT12)	-0.357462	0.19085	negtive
Csnk2a1	AA-NAT(ZT20)	0.357143	0.19162	positive
Klf10	AA-NAT(ZT4)	0.357143	0.19162	positive
Tipin	AA-NAT(ZT0)	0.357143	0.19162	positive
Serpine1	AA-NAT(ZT4)	0.353571	0.196349	positive
Hcrtr2	AA-NAT(ZT8)	0.353571	0.196349	positive
Senp3	AA-NAT(ZT12)	-0.350313	0.200515	negtive
Gsk3b	AA-NAT(ZT0)	0.35	0.201155	positive
Nfil3	AA-NAT(ZT4)	0.35	0.201155	positive
Npy2r	AA-NAT(ZT0)	0.35	0.201155	positive
Per2	AA-NAT(ZT0)	0.346429	0.206038	positive
Gsk3b	AA-NAT(ZT8)	0.342857	0.211	positive
Serpine1	AA-NAT(ZT16)	-0.342857	0.211	negtive
Rasd1	AA-NAT(ZT16)	-0.339286	0.216039	negtive
Auts2	AA-NAT(ZT0)	0.335714	0.221157	positive
Npffr1	AA-NAT(ZT0)	0.331875	0.22687	positive
Tipin	AA-NAT(ZT12)	0.330653	0.22869	positive
Hlf	AA-NAT(ZT4)	0.327078	0.234065	positive
Timeless	AA-NAT(ZT16)	-0.326139	0.235489	negtive
Csnk2a2	AA-NAT(ZT16)	0.325	0.236982	positive
Senp3	AA-NAT(ZT8)	-0.321429	0.242415	negtive
Nr1d2	AA-NAT(ZT8)	0.317857	0.247928	positive
Csnk2a2	AA-NAT(ZT4)	0.317857	0.247928	positive
Senp3	AA-NAT(ZT20)	-0.317857	0.247928	negtive
Mettl3	AA-NAT(ZT20)	-0.317857	0.247928	negtive
Arntl	AA-NAT(ZT20)	-0.314286	0.25352	negtive
Cry1	AA-NAT(ZT8)	0.314286	0.25352	positive
Npy2r	AA-NAT(ZT8)	0.307143	0.264942	positive
Npy5r	AA-NAT(ZT4)	-0.304661	0.269552	negtive
Npas2	AA-NAT(ZT0)	-0.303571	0.270772	negtive
Rasd1	AA-NAT(ZT0)	0.303571	0.270772	positive
Rorb	AA-NAT(ZT0)	0.303571	0.270772	positive
Gsk3b	AA-NAT(ZT20)	0.3	0.276682	positive
Npy1r	AA-NAT(ZT20)	-0.3	0.276682	negtive
Bhlhe41	AA-NAT(ZT20)	-0.296429	0.282672	negtive
Per1	AA-NAT(ZT4)	0.296429	0.282672	positive
Bhlhe41	AA-NAT(ZT16)	-0.289286	0.294889	negtive
Arntl	AA-NAT(ZT12)	-0.287757	0.29834	negtive
Cry2	AA-NAT(ZT12)	-0.282395	0.307834	negtive
Rorb	AA-NAT(ZT20)	0.282143	0.307425	positive
Fbxl3	AA-NAT(ZT12)	0.277033	0.3175	positive
Npy5r	AA-NAT(ZT8)	0.275987	0.319406	positive
Rorc	AA-NAT(ZT16)	-0.274817	0.321546	negtive
Arntl2	AA-NAT(ZT16)	-0.27398	0.323082	negtive
Csnk2b	AA-NAT(ZT12)	-0.273459	0.324041	negtive
Clock	AA-NAT(ZT4)	0.264286	0.340147	positive
Klf10	AA-NAT(ZT20)	-0.260714	0.346928	negtive
Per1	AA-NAT(ZT0)	0.257143	0.353786	positive
Cry2	AA-NAT(ZT8)	-0.257143	0.353786	negtive
Npy1r	AA-NAT(ZT16)	0.257143	0.353786	positive
Adcyap1	AA-NAT(ZT20)	0.257143	0.353786	positive
Rorc	AA-NAT(ZT12)	-0.254339	0.360315	negtive
Csnk1d	AA-NAT(ZT12)	-0.253798	0.361372	negtive
Per3	AA-NAT(ZT0)	0.253798	0.361372	positive
Csnk2a2	AA-NAT(ZT0)	0.246429	0.374825	positive
Nr1d2	AA-NAT(ZT16)	-0.239286	0.389235	negtive
Tef	AA-NAT(ZT0)	-0.239286	0.389235	negtive
Npas2	AA-NAT(ZT8)	-0.239286	0.389235	negtive
Rora	AA-NAT(ZT4)	0.236068	0.396975	positive
Csnk1d	AA-NAT(ZT0)	-0.235714	0.396553	negtive
Tipin	AA-NAT(ZT16)	-0.235714	0.396553	negtive
Rora	AA-NAT(ZT12)	-0.232587	0.404176	negtive
Tef	AA-NAT(ZT20)	-0.232143	0.403947	negtive
Per2	AA-NAT(ZT4)	0.228571	0.411416	positive
Clock	AA-NAT(ZT12)	0.218052	0.434972	positive
Npy1r	AA-NAT(ZT8)	0.217857	0.434267	positive
Tef	AA-NAT(ZT4)	0.217857	0.434267	positive
Dbp	AA-NAT(ZT8)	-0.214286	0.44203	negtive
Cry2	AA-NAT(ZT4)	0.214286	0.44203	positive
Mettl3	AA-NAT(ZT4)	-0.210714	0.449866	negtive
Arntl2	AA-NAT(ZT8)	0.209514	0.4536	positive
Csnk2a1	AA-NAT(ZT0)	0.203571	0.46575	positive
Adcyap1	AA-NAT(ZT0)	0.203571	0.46575	positive
Csnk2b	AA-NAT(ZT4)	0.2	0.473797	positive
Npy1r	AA-NAT(ZT0)	-0.2	0.473797	negtive
Rorc	AA-NAT(ZT0)	-0.199525	0.475886	negtive
Mtnr1a	AA-NAT(ZT20)	0.199182	0.47666	positive
Npy2r	AA-NAT(ZT20)	-0.196429	0.481914	negtive
Klf10	AA-NAT(ZT8)	0.196429	0.481914	positive
Arntl2	AA-NAT(ZT4)	-0.193398	0.489811	negtive
Nfil3	AA-NAT(ZT8)	0.192857	0.4901	positive
Arntl	AA-NAT(ZT16)	-0.189286	0.498353	negtive
Rora	AA-NAT(ZT20)	-0.188116	0.501966	negtive
Npffr2	AA-NAT(ZT12)	0.185743	0.507475	positive
Npffr2	AA-NAT(ZT4)	-0.185577	0.507861	negtive
Npffr2	AA-NAT(ZT16)	0.185577	0.507861	positive
Npffr2	AA-NAT(ZT20)	-0.185577	0.507861	negtive
Rorc	AA-NAT(ZT4)	0.184466	0.510449	positive
Csnk2b	AA-NAT(ZT8)	-0.182143	0.515061	negtive
Nr1d1	AA-NAT(ZT12)	-0.178731	0.523907	negtive
Csnk1e	AA-NAT(ZT12)	-0.175156	0.532376	negtive
Bhlhe41	AA-NAT(ZT4)	-0.171429	0.540611	negtive
Klf10	AA-NAT(ZT16)	0.171429	0.540611	positive
Hcrtr2	AA-NAT(ZT4)	0.171429	0.540611	positive
Hlf	AA-NAT(ZT16)	0.169795	0.545192	positive
Arntl2	AA-NAT(ZT0)	0.169223	0.546566	positive
Npff	AA-NAT(ZT4)	-0.167857	0.549255	negtive
Auts2	AA-NAT(ZT12)	0.16622	0.55381	positive
Per2	AA-NAT(ZT8)	0.164286	0.557961	positive
Nr1d1	AA-NAT(ZT8)	-0.164286	0.557961	negtive
Nr1d1	AA-NAT(ZT20)	-0.164286	0.557961	negtive
Mettl3	AA-NAT(ZT16)	-0.164286	0.557961	negtive
Senp3	AA-NAT(ZT4)	0.160714	0.566727	positive
Csnk2b	AA-NAT(ZT16)	0.160714	0.566727	positive
Npy2r	AA-NAT(ZT4)	0.157143	0.575554	positive
Per2	AA-NAT(ZT20)	0.153571	0.584439	positive
Rasd1	AA-NAT(ZT20)	0.15	0.593383	positive
Nr1d2	AA-NAT(ZT4)	0.15	0.593383	positive
Fbxl3	AA-NAT(ZT16)	-0.15	0.593383	negtive
Hcrtr2	AA-NAT(ZT20)	-0.15	0.593383	negtive
Rorb	AA-NAT(ZT16)	-0.146429	0.602383	negtive
Bhlhe40	AA-NAT(ZT16)	-0.146429	0.602383	negtive
Npy5r	AA-NAT(ZT0)	0.14337	0.61023	positive
Npy5r	AA-NAT(ZT20)	0.14337	0.61023	positive
Per3	AA-NAT(ZT16)	-0.141198	0.615709	negtive
Npffr1	AA-NAT(ZT8)	0.140408	0.617704	positive
Rorc	AA-NAT(ZT8)	0.139291	0.620533	positive
Hcrtr2	AA-NAT(ZT0)	-0.139286	0.620551	negtive
Mtnr1a	AA-NAT(ZT12)	0.137522	0.625022	positive
Hlf	AA-NAT(ZT0)	0.135836	0.629311	positive
Hlf	AA-NAT(ZT20)	-0.135836	0.629311	negtive
Nr1d1	AA-NAT(ZT4)	-0.135714	0.629716	negtive
Npy5r	AA-NAT(ZT12)	0.13453	0.632641	positive
Rorb	AA-NAT(ZT12)	0.134048	0.63387	positive
Mtnr1a	AA-NAT(ZT4)	-0.132788	0.637092	negtive
Per1	AA-NAT(ZT12)	-0.132261	0.638442	negtive
Per3	AA-NAT(ZT20)	0.132261	0.638442	positive
Hcrtr2	AA-NAT(ZT16)	0.132143	0.638933	positive
Csnk1e	AA-NAT(ZT20)	-0.128571	0.648202	negtive
Npff	AA-NAT(ZT20)	-0.128571	0.648202	negtive
Pax6	AA-NAT(ZT16)	-0.125112	0.656846	negtive
Npffr1	AA-NAT(ZT20)	-0.125091	0.6569	negtive
Clock	AA-NAT(ZT0)	0.125	0.657521	positive
Rev1	AA-NAT(ZT16)	-0.125	0.657521	negtive
Per2	AA-NAT(ZT16)	0.121429	0.666889	positive
Serpine1	AA-NAT(ZT20)	-0.121429	0.666889	negtive
Csnk2a1	AA-NAT(ZT16)	-0.121429	0.666889	negtive
Rev1	AA-NAT(ZT4)	0.121429	0.666889	positive
Rorb	AA-NAT(ZT4)	-0.117857	0.676305	negtive
Csnk2a2	AA-NAT(ZT20)	0.117857	0.676305	positive
Rora	AA-NAT(ZT16)	0.11619	0.680074	positive
Vipr2	AA-NAT(ZT12)	0.112601	0.689494	positive
Clock	AA-NAT(ZT8)	0.110714	0.695276	positive
Auts2	AA-NAT(ZT16)	0.110714	0.695276	positive
Mettl3	AA-NAT(ZT8)	-0.110714	0.695276	negtive
Per3	AA-NAT(ZT12)	0.109123	0.698662	positive
Mtnr1a	AA-NAT(ZT16)	-0.108812	0.699484	negtive
Per1	AA-NAT(ZT16)	-0.107143	0.704828	negtive
Fbxl3	AA-NAT(ZT0)	-0.107143	0.704828	negtive
Csnk2a2	AA-NAT(ZT8)	0.107143	0.704828	positive
Rev1	AA-NAT(ZT8)	0.107143	0.704828	positive
Npy1r	AA-NAT(ZT12)	-0.103664	0.713133	negtive
Npff	AA-NAT(ZT0)	0.103571	0.714424	positive
Adcyap1	AA-NAT(ZT12)	0.101877	0.717891	positive
Hcrtr2	AA-NAT(ZT12)	0.100089	0.722659	positive
Cry2	AA-NAT(ZT0)	-0.1	0.72406	negtive
Cry1	AA-NAT(ZT16)	-0.1	0.72406	negtive
Dbp	AA-NAT(ZT4)	0.1	0.72406	positive
Dbp	AA-NAT(ZT16)	0.1	0.72406	positive
Csnk1e	AA-NAT(ZT4)	0.1	0.72406	positive
Npff	AA-NAT(ZT16)	0.1	0.72406	positive
Rasd1	AA-NAT(ZT12)	0.0929402	0.741822	positive
Bhlhe41	AA-NAT(ZT0)	-0.0928571	0.743454	negtive
Cry2	AA-NAT(ZT16)	0.0928571	0.743454	positive
Rev1	AA-NAT(ZT0)	0.0928571	0.743454	positive
Arntl	AA-NAT(ZT8)	0.0892857	0.753207	positive
Dbp	AA-NAT(ZT0)	-0.0892857	0.753207	negtive
Npy5r	AA-NAT(ZT16)	0.0860221	0.7605	positive
Csnk2a2	AA-NAT(ZT12)	0.0857909	0.761126	positive
Mettl3	AA-NAT(ZT0)	0.0857143	0.762997	positive
Auts2	AA-NAT(ZT4)	-0.0821429	0.772822	negtive
Bhlhe40	AA-NAT(ZT12)	0.080429	0.775692	positive
Rorc	AA-NAT(ZT20)	-0.0790569	0.779431	negtive
Nr1d2	AA-NAT(ZT12)	-0.0768544	0.785441	negtive
Tef	AA-NAT(ZT12)	0.0750671	0.790327	positive
Nr1d2	AA-NAT(ZT0)	-0.075	0.792571	negtive
Serpine1	AA-NAT(ZT12)	0.0697051	0.805028	positive
Npff	AA-NAT(ZT12)	0.0697051	0.805028	positive
Vipr2	AA-NAT(ZT4)	0.0678571	0.812443	positive
Mettl3	AA-NAT(ZT12)	-0.0643432	0.819789	negtive
Vipr2	AA-NAT(ZT8)	-0.0642857	0.822421	negtive
Bhlhe41	AA-NAT(ZT12)	0.0625559	0.824723	positive
Vipr2	AA-NAT(ZT20)	0.0607143	0.832426	positive
Pax6	AA-NAT(ZT0)	0.0589813	0.834607	positive
Pax6	AA-NAT(ZT4)	-0.0571939	0.839558	negtive
Senp3	AA-NAT(ZT0)	-0.0571429	0.842456	negtive
Bhlhe41	AA-NAT(ZT8)	0.0571429	0.842456	positive
Hlf	AA-NAT(ZT12)	0.0536673	0.849344	positive
Npy2r	AA-NAT(ZT16)	-0.0535714	0.852509	negtive
Serpine1	AA-NAT(ZT8)	0.0535714	0.852509	positive
Rasd1	AA-NAT(ZT4)	-0.05	0.862585	negtive
Vipr2	AA-NAT(ZT16)	-0.05	0.862585	negtive
Klf10	AA-NAT(ZT0)	-0.05	0.862585	negtive
Npy2r	AA-NAT(ZT12)	0.0446828	0.874362	positive
Csnk2a1	AA-NAT(ZT12)	0.0446828	0.874362	positive
Csnk1d	AA-NAT(ZT16)	0.0428571	0.882796	positive
Tef	AA-NAT(ZT16)	0.0428571	0.882796	positive
Arntl	AA-NAT(ZT0)	-0.0428571	0.882796	negtive
Bhlhe40	AA-NAT(ZT8)	-0.0428571	0.882796	negtive
Npffr1	AA-NAT(ZT12)	-0.039605	0.888552	negtive
Auts2	AA-NAT(ZT20)	0.0392857	0.892928	positive
Vipr2	AA-NAT(ZT0)	0.0392857	0.892928	positive
Nr1d2	AA-NAT(ZT20)	-0.0357143	0.903077	negtive
Clock	AA-NAT(ZT16)	0.0321429	0.91324	positive
Fbxl3	AA-NAT(ZT8)	0.0321429	0.91324	positive
Fbxl3	AA-NAT(ZT4)	-0.0321429	0.91324	negtive
Per2	AA-NAT(ZT12)	0.0303843	0.914398	positive
Gsk3b	AA-NAT(ZT16)	-0.0285714	0.923417	negtive
Nfil3	AA-NAT(ZT12)	0.0268097	0.924441	positive
Csnk2a1	AA-NAT(ZT4)	0.025	0.933604	positive
Senp3	AA-NAT(ZT16)	0.0214286	0.943802	positive
Rev1	AA-NAT(ZT20)	0.0214286	0.943802	positive
Per3	AA-NAT(ZT4)	-0.0178731	0.94959	negtive
Bhlhe40	AA-NAT(ZT4)	-0.0178571	0.954008	negtive
Npas2	AA-NAT(ZT16)	-0.0178571	0.954008	negtive
Adcyap1	AA-NAT(ZT16)	0.0178571	0.954008	positive
Cry1	AA-NAT(ZT0)	-0.0142857	0.964222	negtive
Arntl2	AA-NAT(ZT20)	-0.0120873	0.965898	negtive
Nr1d1	AA-NAT(ZT16)	-0.0107143	0.97444	negtive
Csnk1e	AA-NAT(ZT8)	-0.0107143	0.97444	negtive
Timeless	AA-NAT(ZT4)	-0.00900937	0.974579	negtive
Pax6	AA-NAT(ZT12)	0.00894454	0.974762	positive
Npffr1	AA-NAT(ZT4)	0.00765865	0.978389	positive
Cry1	AA-NAT(ZT20)	-0.00714286	0.984663	negtive
Nfil3	AA-NAT(ZT20)	-0.00714286	0.984663	negtive
Rev1	AA-NAT(ZT12)	-0.00536193	0.984869	negtive
Clock	AA-NAT(ZT20)	0.00357143	0.994887	positive
Gsk3b	AA-NAT(ZT4)	0.00357143	0.994887	positive
Bhlhe40	AA-NAT(ZT20)	0.00357143	0.994887	positive
Npffr2	AA-NAT(ZT8)	0	1
Csnk2b	AA-NAT(ZT0)	0	1
Tipin	AA-NAT(ZT4)	0	1
Adcyap1	AA-NAT(ZT4)	0	1
Footnote：Spearman correlation analysis separately for the gene expression levels and the concentrations of MT. p_value＜0.05 were considered to be significant correlation.
